# Supplementary material for: Personen mit Migrationshintergrund in der NAKO Gesundheitsstudie – soziodemografische Merkmale und Vergleiche mit der autochthonen deutschen Bevölkerung
Source: Springer Nature journal article supplement (doi:10.1007/s00103-020-03097-9), 2020-02-07
Supplement: MOESM1 [file 17652144]

## Personen mit Migrationshintergrund in der NAKO Gesundheitsstudie – soziodemografische Merkmale und Vergleiche mit der autochthonen deutschen Bevölkerung

Christian Wiessner<sup>1</sup>, Thomas Keil<sup>2,3,4</sup>, Lilian Krist<sup>2</sup>, Hajo Zeeb<sup>5,6</sup>, Nico Dragano<sup>7</sup>, Borge Schmidt<sup>8</sup>, Wolfgang Ahrens<sup>5,9</sup>, Klaus Berger<sup>10</sup>, Stefanie Castell<sup>11</sup>, Julia Fricke<sup>2</sup>, Amand Führer<sup>12</sup>, Sylvia Gastell<sup>13</sup>, Halina Greiser<sup>14</sup>, Feng Guo<sup>15</sup>, Lina Jaeschke<sup>16</sup>, Carmen Jochem<sup>17</sup>, Karl-Heinz Jöckel<sup>8</sup>, Rudolf Kaaks<sup>14</sup>, Lena Koch-Gallenkamp<sup>15</sup>, Gérard Krause<sup>11,18</sup>, Oliver Kuss<sup>19</sup>, Nicole Legath<sup>10</sup>, Michael Leitzmann<sup>17</sup>, Wolfgang Lieb<sup>20</sup>, Claudia Meinke-Franze<sup>21</sup>, Christa Meisinger<sup>22,23,24</sup>, Rafael Mikolajczyk<sup>12</sup>, Nadia Obi<sup>1</sup>, Tobias Pischon<sup>16,25,26,27</sup>, Sabine Schipf<sup>21</sup>, Claudia Schmoor<sup>28</sup>, Sara Schramm<sup>8</sup>, Matthias B. Schulze<sup>29</sup>, Nicole Sowarka<sup>24,30</sup>, Sabina Waniek<sup>20</sup>, Claudia Wigmann<sup>31</sup>, Stefan N. Willich<sup>2</sup>, Heiko Becher<sup>1</sup>

<sup>1</sup> Institut für Medizinische Biometrie und Epidemiologie, Universitätsklinikum Hamburg-Eppendorf, Hamburg, Deutschland

<sup>2</sup> Institut für Sozialmedizin, Epidemiologie und Gesundheitsökonomie, Charité – Universitätsmedizin Berlin, Berlin, Deutschland

<sup>3</sup> Institut für Klinische Epidemiologie und Biometrie, Universität Würzburg, Würzburg, Deutschland

<sup>4</sup> Landesinstitut für Gesundheit, Bayerisches Landesamt für Gesundheit und Lebensmittelsicherheit, Bad Kissingen, Deutschland

<sup>5</sup> Leibniz-Institut für Präventionsforschung und Epidemiologie – BIPS, Bremen, Deutschland

<sup>6</sup> Health Sciences Bremen, Universität Bremen, Deutschland

<sup>7</sup> Institut für Medizinische Soziologie, Centre for Health and Society, Medizinische Fakultät der Heinrich-Heine-Universität Düsseldorf, Düsseldorf, Deutschland

<sup>8</sup> Medizinische Informatik, Biometrie und Epidemiologie (IMIBE), Medizinische Fakultät der Universität Duisburg-Essen, Universitätsklinikum Essen, Deutschland

<sup>9</sup> Institut für Statistik, Fachbereich Mathematik und Informatik, Universität Bremen, Deutschland

<sup>10</sup> Institut für Epidemiologie und Sozialmedizin, Universität Münster, Deutschland

<sup>11</sup> Abteilung für Epidemiologie, Helmholtz-Zentrum für Infektionsforschung (HZI), Braunschweig, Deutschland

<sup>12</sup> Institut für Medizinische Epidemiologie, Biometrie und Informatik (IMEBI) Medizinische Fakultät der Martin-Luther-Universität Halle-Wittenberg, Deutschland

<sup>13</sup> Deutsches Institut für Ernährungsforschung Potsdam-Rehbrücke, NAKO Studienzentrum, Nuthetal, Deutschland

<sup>14</sup> Abteilung Epidemiologie von Krebserkrankungen, Deutsches Krebsforschungszentrum (DKFZ), Heidelberg, Deutschland

<sup>15</sup> Abteilung Klinische Epidemiologie und Altersforschung, Deutsches Krebsforschungszentrum (DKFZ), Heidelberg, Deutschland

<sup>16</sup> Forschergruppe Molekulare Epidemiologie, Max-Delbrück-Centrum für Molekulare Medizin in der Helmholtz-Gemeinschaft (MDC), Berlin, Deutschland

<sup>17</sup> Institut für Epidemiologie und Präventivmedizin, Universität Regensburg, Deutschland

<sup>18</sup> Medizinische Hochschule Hannover (MHH), Hannover, Deutschland

<sup>19</sup> Institut für Biometrie und Epidemiologie, Deutsches Diabetes-Zentrum (DDZ), Leibniz-Zentrum für Diabetes-Forschung, Heinrich-Heine-Universität Düsseldorf, Düsseldorf, Deutschland

<sup>20</sup> Institut für Epidemiologie, Christian-Albrechts-Universität zu Kiel, Kiel, Deutschland

<sup>21</sup> Institut für Community Medicine, Universitätsmedizin Greifswald, Greifswald, Deutschland

<sup>22</sup> SFG Klinische Epidemiologie, Helmholtz Zentrum München, Neuherberg, Deutschland

<sup>23</sup> Ludwig-Maximilians-Universität München, Lehrstuhl für Epidemiologie, am UNIKA-T Augsburg, Augsburg, Deutschland

<sup>24</sup> NAKO Studienzentrum, Universitätsklinikum Augsburg

<sup>25</sup> Charité – Universitätsmedizin Berlin, Berlin, Germany, Deutschland

<sup>26</sup> Deutsches Zentrum für Herz-Kreislauf-Forschung (DZHK), Partnerstandort Berlin, Deutschland

<sup>27</sup> MDC/BIH Biobank, Max-Delbrück-Centrum für Molekulare Medizin in der Helmholtz-Gemeinschaft (MDC) und Berlin Institute of Health (BIH), Berlin, Deutschland

<sup>28</sup> Zentrum Klinische Studien, Universitätsklinikum Freiburg, Medizinische Fakultät, Albert-Ludwigs-Universität Freiburg, Deutschland

<sup>29</sup> Abteilung Molekulare Epidemiologie, Deutsches Institut für Ernährungsforschung Potsdam-Rehbrücke, Nuthetal, Deutschland

<sup>30</sup> Institut für Epidemiologie, Helmholtz Zentrum München, Neuherberg, Deutschland

<sup>31</sup> IUF-Leibniz Institut für umweltmedizinische Forschung, Düsseldorf, Deutschland

**Korrespondenzadresse**

Christian Wiessner  
Institut für Medizinische Biometrie und Epidemiologie,  
Universitätsklinikum Hamburg-Eppendorf  
Martinistr. 52  
20251 Hamburg  
[c.wiessner@uke.de](mailto:c.wiessner@uke.de)

Inhalt:

**Tabelle Z1) Geburtsländer der Personen mit Migrationshintergrund (PmM), die an der NAKO Gesundheitsstudie bis zur Halbzeit der Basiserhebung teilgenommen haben. Aufteilung nach Kontinent**

Tabelle Z1: Geburtsländer der Personen mit Migrationshintergrund (PmM), die an der NAKO Gesundheitsstudie bis zur Halbzeit der Basiserhebung teilgenommen haben. Aufteilung nach Kontinent

| Land/Kontinent                | Anzahl |
|-------------------------------|--------|
| <b>Europa</b>                 |        |
| Deutschland                   | 5142   |
| Polen                         | 1817   |
| Russland                      | 1082   |
| Rumänien                      | 595    |
| Ukraine                       | 310    |
| Italien                       | 303    |
| Österreich                    | 293    |
| Tschechien                    | 269    |
| Frankreich                    | 245    |
| Großbritannien und Nordirland | 161    |
| Bosnien und Herzegowina       | 157    |
| Spanien                       | 143    |
| Serbien                       | 130    |
| Ungarn                        | 130    |
| Kroatien                      | 128    |
| Kosovo                        | 119    |
| Griechenland                  | 116    |
| Niederlande                   | 115    |
| Bulgarien                     | 113    |
| Schweiz                       | 91     |
| Finnland                      | 63     |
| Mazedonien                    | 55     |
| Weißrussland                  | 51     |
| Portugal                      | 46     |
| Litauen                       | 44     |
| Dänemark                      | 43     |
| Schweden                      | 39     |
| Slowakei                      | 39     |
| Lettland                      | 32     |
| Belgien                       | 29     |
| Moldawien                     | 28     |
| Slowenien                     | 25     |
| Irland                        | 23     |
| Estland                       | 18     |
| Norwegen                      | 18     |
| Albanien                      | 14     |
| Montenegro                    | 14     |

|                             |     |
|-----------------------------|-----|
| Luxemburg                   | 7   |
| <b>Nord-/Zentralamerika</b> |     |
| Vereinigte Staaten (USA)    | 127 |
| Kanada                      | 31  |
| Mexiko                      | 29  |
| Kuba                        | 16  |
| Dominikanische Republik     | 6   |
| El Salvador                 | 3   |
| Nicaragua                   | 3   |
| Guatemala                   | 2   |
| Honduras                    | 2   |
| Jamaika                     | 2   |
| Trinidad und Tobago         | 2   |
| Barbados                    | 1   |
| Costa Rica                  | 1   |
| Haiti                       | 1   |
| <b>Südamerika</b>           |     |
| Brasilien                   | 77  |
| Argentinien                 | 33  |
| Chile                       | 33  |
| Kolumbien                   | 30  |
| Peru                        | 26  |
| Bolivien                    | 15  |
| Venezuela                   | 14  |
| Ecuador                     | 7   |
| Paraguay                    | 5   |
| Uruguay                     | 5   |
| Guyana                      | 1   |
| <b>Afrika</b>               |     |
| Ghana                       | 81  |
| Marokko                     | 68  |
| Tunesien                    | 50  |
| Ägypten                     | 42  |
| Nigeria                     | 36  |
| Kamerun                     | 31  |
| Togo                        | 30  |
| Algerien                    | 29  |
| Südafrika                   | 20  |
| Kenia                       | 18  |
| Gambia                      | 14  |
| Mosambik                    | 14  |
| Eritrea                     | 13  |

|                               |      |
|-------------------------------|------|
| Äthiopien                     | 13   |
| Kongo, Demokratische Republik | 12   |
| Angola                        | 11   |
| Libyen                        | 10   |
| Senegal                       | 9    |
| Elfenbeinküste                | 8    |
| Uganda                        | 8    |
| Guinea                        | 7    |
| Sudan                         | 6    |
| Benin                         | 5    |
| Burkina Faso                  | 4    |
| Kap Verde                     | 4    |
| Niger                         | 4    |
| Tansania                      | 4    |
| Madagaskar                    | 3    |
| Mali                          | 3    |
| Namibia                       | 3    |
| Sierra Leone                  | 3    |
| Simbabwe                      | 3    |
| Somalia                       | 3    |
| Burundi                       | 2    |
| Liberia                       | 2    |
| Guinea-Bissau                 | 1    |
| Komoren                       | 1    |
| Kongo, Republik               | 1    |
| Lesotho                       | 1    |
| Mauretanien                   | 1    |
| Mauritius                     | 1    |
| Ruanda                        | 1    |
| Sao Tome und Principe         | 1    |
| Zentralafrikanische Republik  | 1    |
| <b>Asien</b>                  |      |
| Türkei                        | 1005 |
| Kasachstan                    | 714  |
| Iran                          | 266  |
| Vietnam                       | 115  |
| Irak                          | 100  |
| China                         | 93   |
| Syrien                        | 86   |
| Afghanistan                   | 84   |
| Libanon                       | 61   |
| Süd-Korea                     | 56   |

|                              |    |
|------------------------------|----|
| Indien                       | 55 |
| Usbekistan                   | 54 |
| Kirgisistan                  | 52 |
| Philippinen                  | 48 |
| Thailand                     | 48 |
| Sri Lanka                    | 41 |
| Tadschikistan                | 35 |
| Japan                        | 29 |
| Aserbaidshan                 | 24 |
| Georgien                     | 21 |
| Pakistan                     | 21 |
| Indonesien                   | 18 |
| Israel                       | 13 |
| Jordanien                    | 13 |
| Armenien                     | 10 |
| Palästina                    | 10 |
| Kuwait                       | 8  |
| Laos                         | 8  |
| Jemen                        | 7  |
| Malaysia                     | 7  |
| Bangladesch                  | 6  |
| Mongolei                     | 6  |
| Nepal                        | 6  |
| Kambodscha                   | 5  |
| Zypern                       | 5  |
| Saudi-Arabien                | 4  |
| Turkmenistan                 | 4  |
| Bhutan                       | 3  |
| Abchasien                    | 1  |
| Myanmar                      | 1  |
| Singapur                     | 1  |
| Vereinigte Arabische Emirate | 1  |
| <b>Ozeanien</b>              |    |
| Australien                   | 12 |
| Neuseeland                   | 8  |
| Mikronesien                  | 1  |
